# Supplementary material
Source: Springer Nature journal article supplement (https://www.springermedizin.de/resource/supplementary/12916_2010_306_MOESM7_ESM.pdf/9599598)

Pre-Puberty

Peri-Puberty

Post-Puberty

Mid  
Humerus

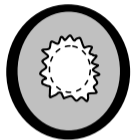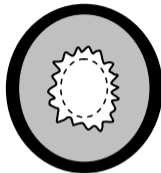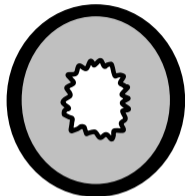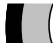

Black region = bone acquisition

Distal  
Humerus

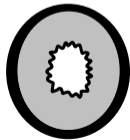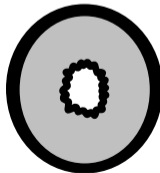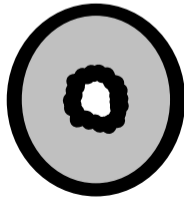

Supplement: MOESM7 [file 9599598]
